# Supplementary material for: Early Assessment of Response to Neoadjuvant Chemotherapy with 18F-FDG-PET/CT in Patients with Advanced-Stage Ovarian Cancer
Source: PubMed Central journal article supplement — Cancer Res Treat. 2020 Apr 28;52(4):1211–8. doi: 10.4143/crt.2019.506 (PMC7577806; doi:10.4143/crt.2019.506), 2020-04-28
Supplement: crt-2019-506-suppl.pdf [file crt-2019-506-suppl.pdf]

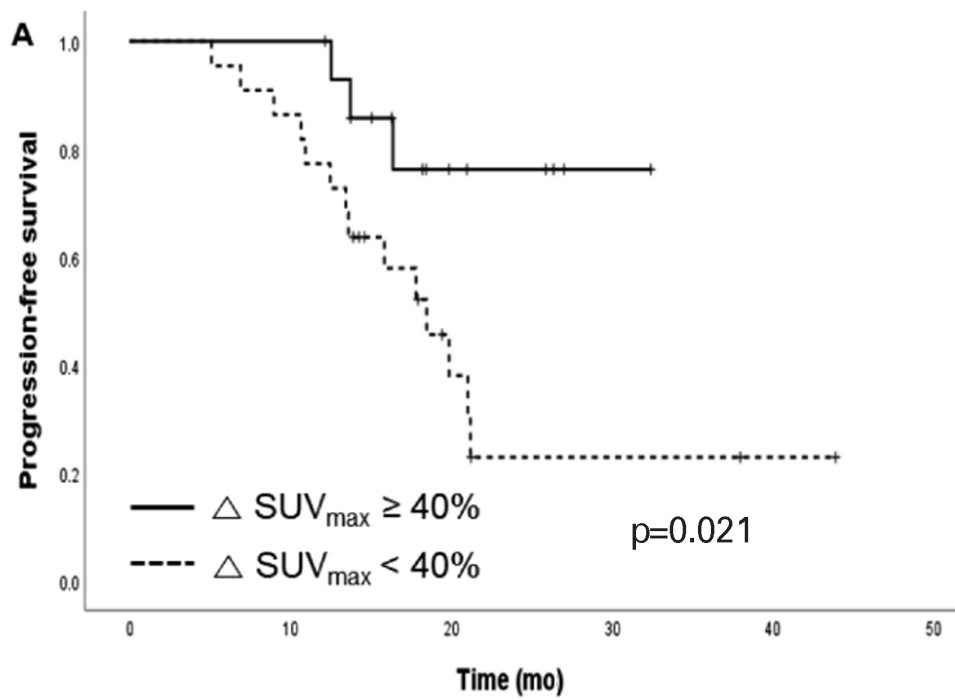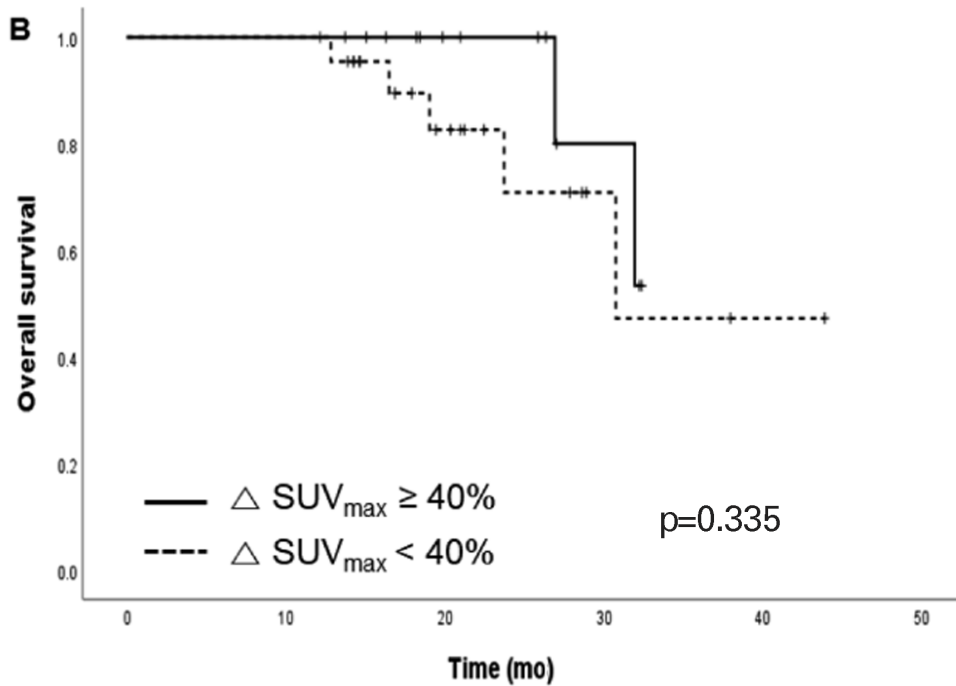

**S1 Fig.** Kaplan-Meier curves of progression-free survival (A) and overall survival (B) according to the decrease of the maximum standardized uptake value ( $\text{SUV}_{\text{max}}$ ) after one cycle of neoadjuvant chemotherapy.
